# Supplementary material for: GDF11 and its receptor ALK4 independently modulate human myoblast migration and fusion
Source: Research Square preprint supplement (doi:10.21203/rs.3.rs-7777108/v1), 2025-10-22
Supplement: Supplementary file 1 [file 53e0b2268334b52cadcd81ed.docx]

**Table 1. Reagent list.**

|  | **Cat. No.** | **Vendor** | **Dilution** |
| --- | --- | --- | --- |
| **Primary antibody or probe** | | | |
| Anti-Desmin | #8281 | Sigma-Aldrich | 1:20 |
| Anti-Pax7 IgG1 |  | DSHB | 1:10 |
| Ki67 | 558616 | BD Biosciences | 1:50 |
| MyHC | MAB4470 | R&D Systems | 1:20 |
| Alexa Fluor 488 Phalloidin | A12379 | ThermoScientific | 1:400 |
| ALK4 | EPR4815 | Abcam | 1:25 |
| Mouse anti-human IgG1 CD29-BV605 | 569040 | BD Biosciences | 1:50 |
| Mouse anti-human IgG1 CD49c-PE | 556025 | BD Biosciences | 1:10 |
| Rat anti-mouse IgG2b CD49d-BV786 | 564397 | BD Biosciences | 1:50 |
| Rat anti-mouse IgG2a CD49e-BV786 | 740863 | BD Biosciences | 1:100 |
| Rat anti-human IgG2a CD49f-BV650 | 563707 | BD Biosciences | 1:50 |
| **Secondary antibody** | | | |
| Goat anti-mouse IgG Alexa Fluor 488 | A-11001 | ThermoScientific | 1:200 |
| Goat anti-rabbit IgG Alexa Fluor 633 | A-21070 | ThermoScientific | 1:200 |
